# Supplementary material for: Design of a universal biointerface for sensitive, selective, and multiplex detection of biomarkers using surface plasmon resonance imaging
Source: Royal Society of Chemistry journal article supplement (doi:10.1039/c3an01374j), 2013-01-01
Supplement: c3an01374j.pdf [file c3an01374j.pdf]

## **Supporting Information**

### **Design of a universal biointerface for sensitive, selective, and multiplex detection of biomarkers using surface plasmon resonance imaging**

**<sup>a</sup>Arghavan Shabani and <sup>\*a,b</sup>Maryam Tabrizian**

<sup>a</sup>Biomedical Engineering Department and <sup>b</sup>Faculty of Dentistry, McGill University, 3775 University Street,  
Montreal, Quebec, Canada H3A 2B4

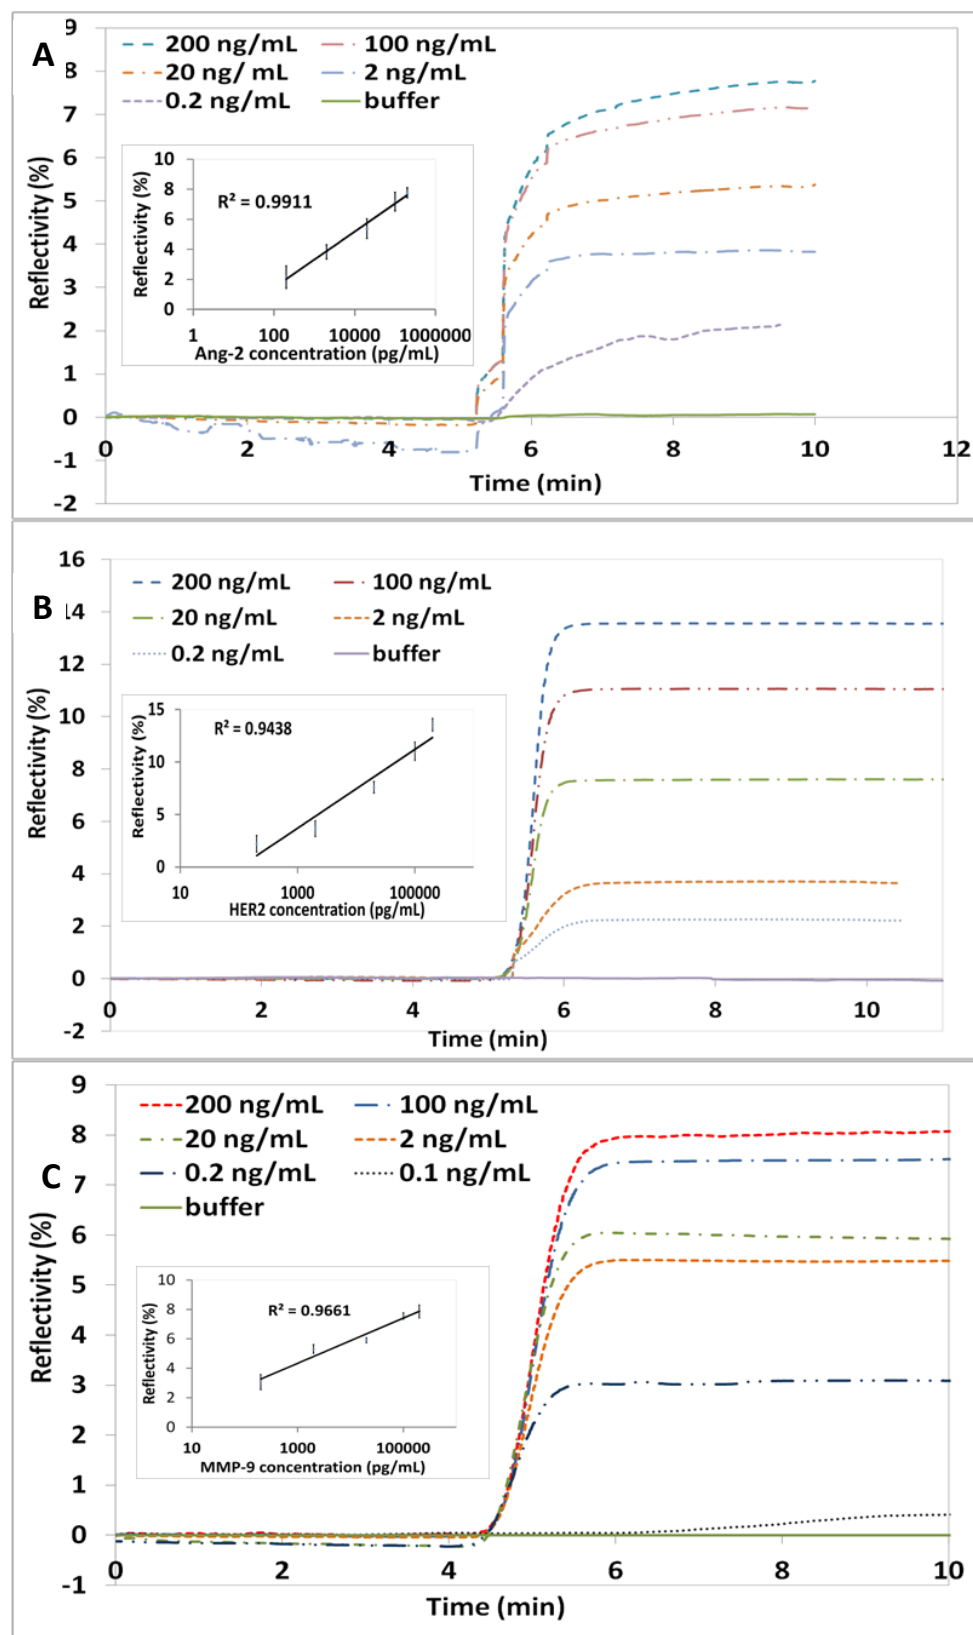

**Figure S1.** SPRi sensogram for direct detection different biomarkers at various concentrations, demonstrating a LOD of 200 pg/mL; The inset is calibration curve indicating correlation between change in reflectivity and biomarker concentrations. The error bar demonstrates the relative standard deviation for the three replicates; (A) Ang-2 (B) HER2 (C) MMP-9.

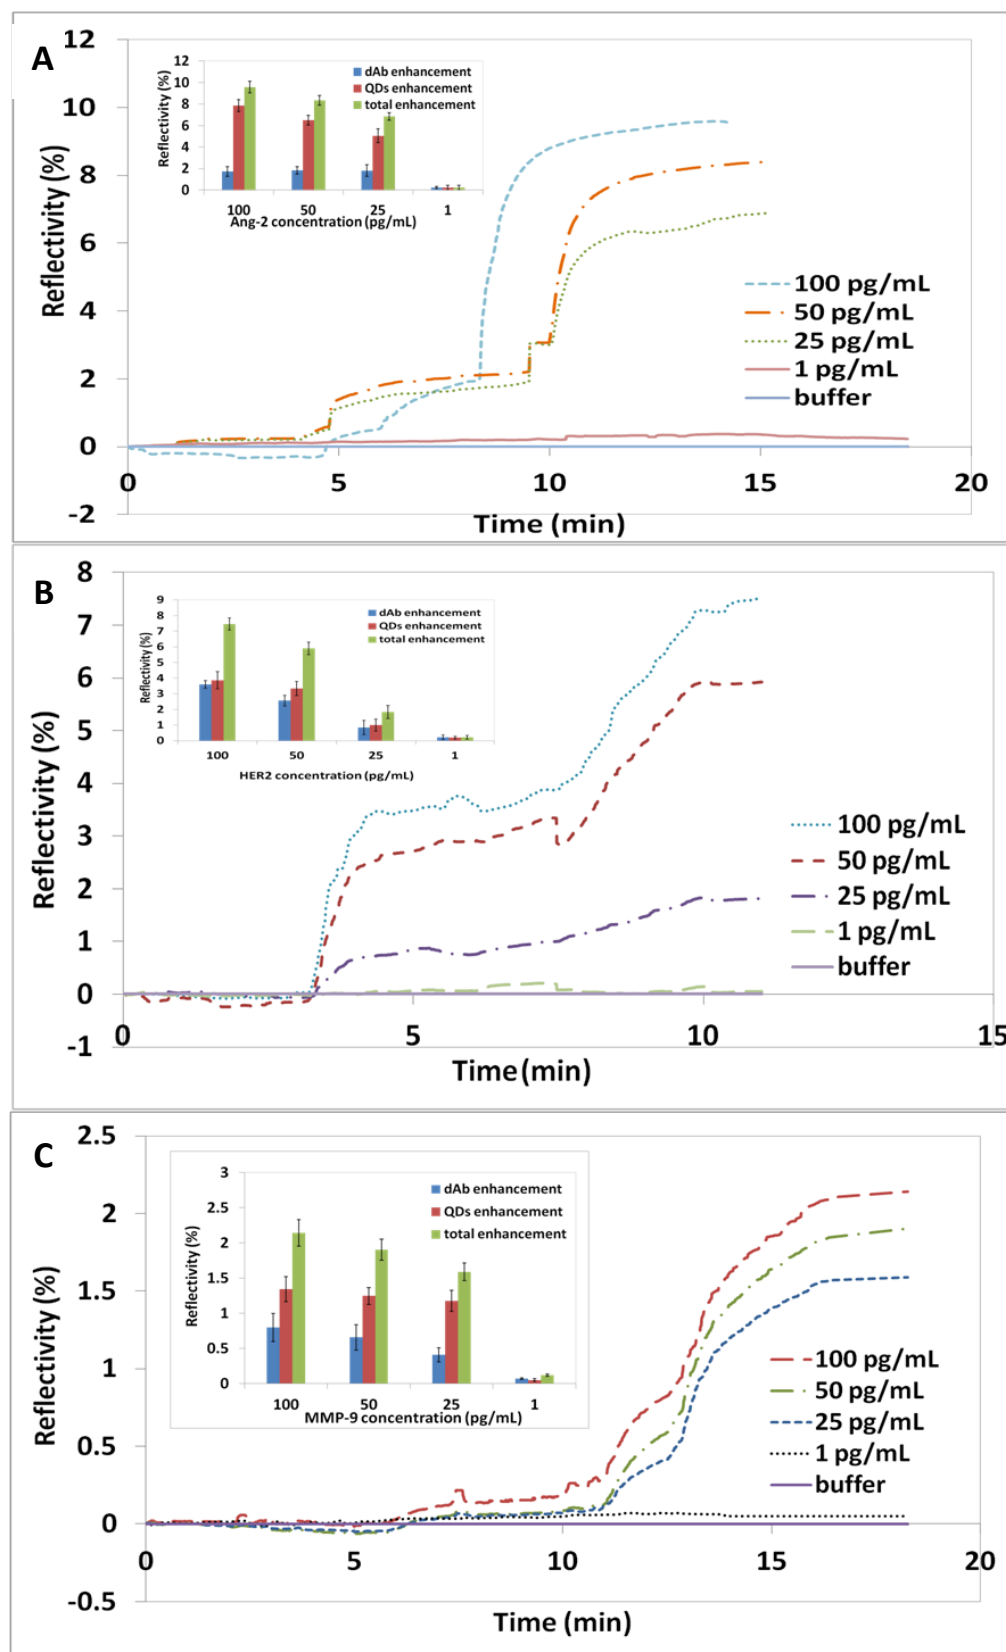

**Figure S2.** SPRi signal amplification of protein biomarkers using biotinylated detection antibody and streptavidin-conjugated QD<sub>800</sub> indicating a LOD of 25 pg/mL; The inset is the amount of signal enhancement with relative standard deviation; (A) Ang-2 (B) HER2 (C) MMP-9.
